# Supplementary material
Source: PubMed Central journal article supplement (PMC3656632)

Fig. 1A

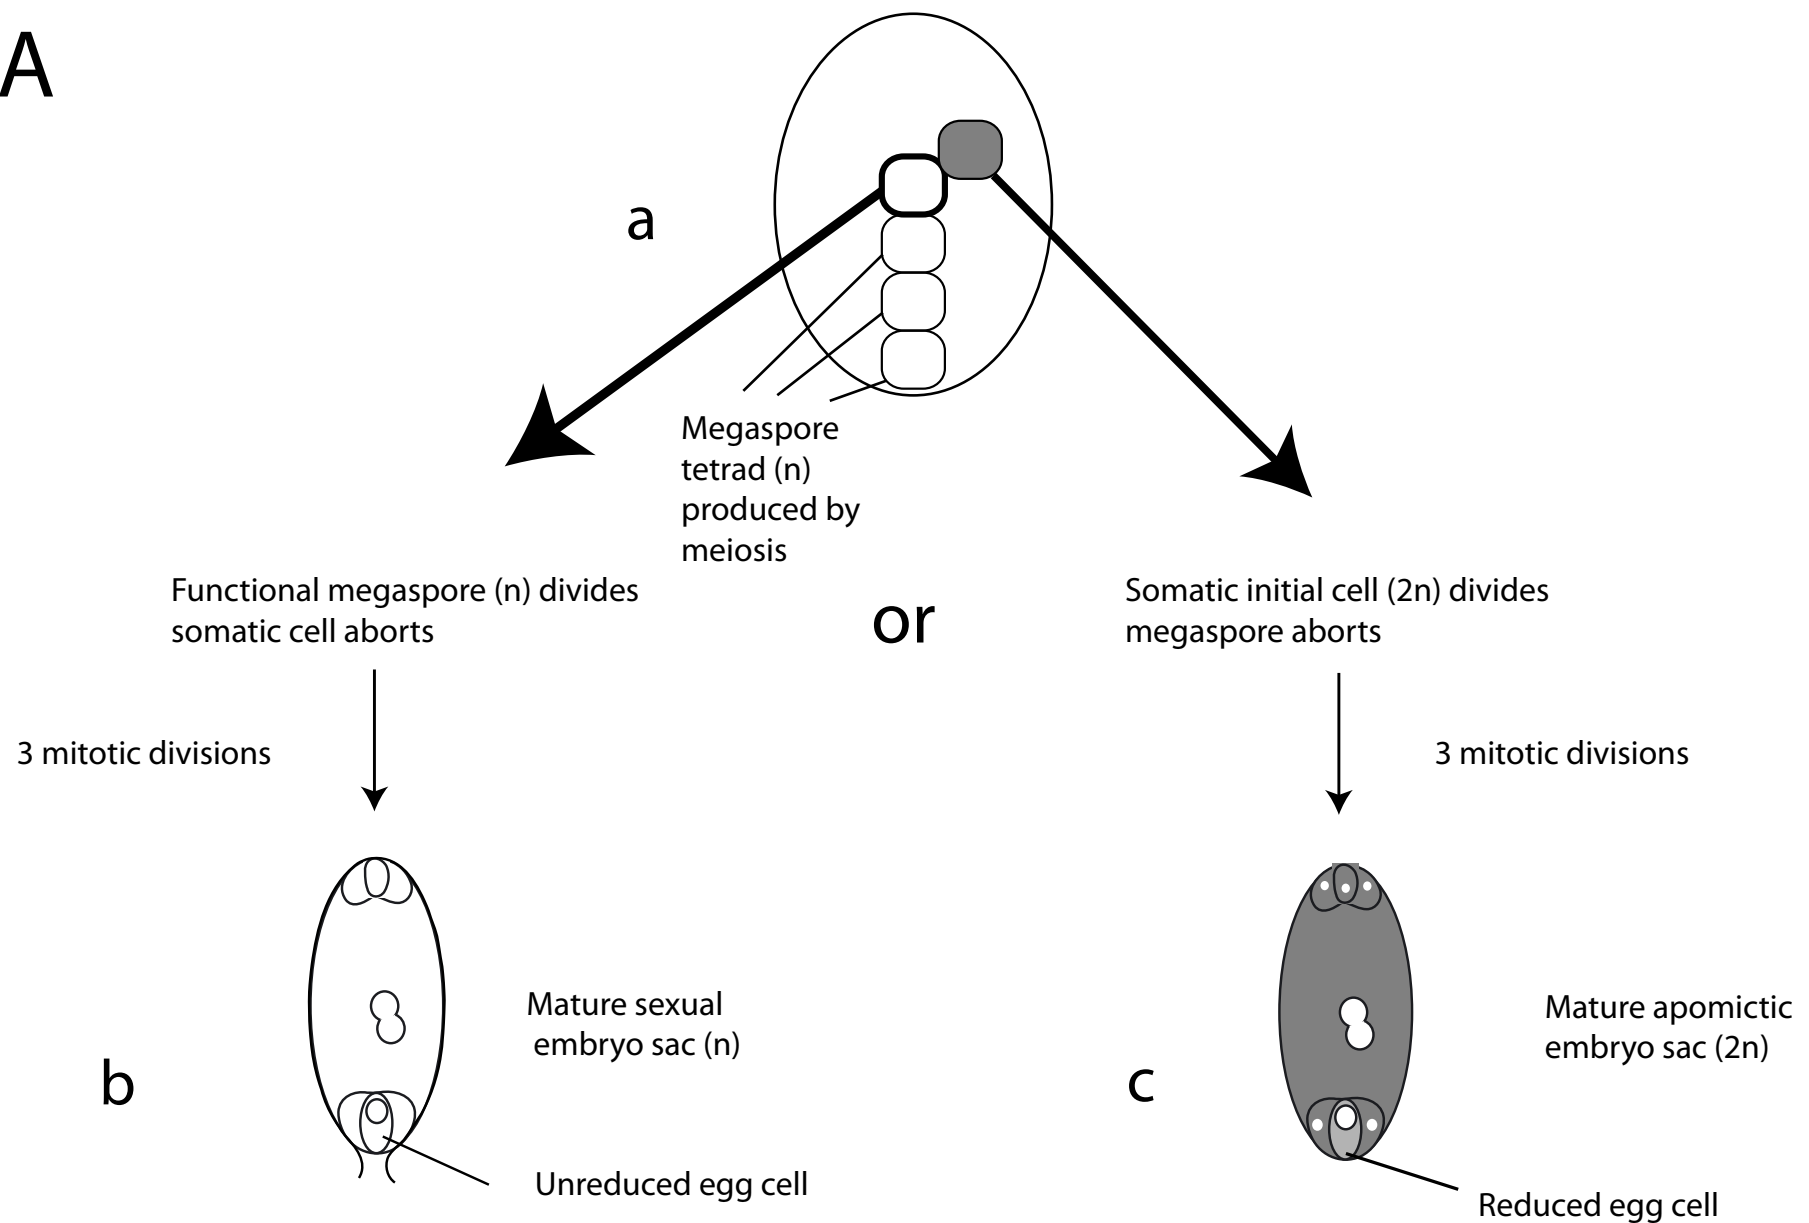

Fig. 1B

Fig. 1B

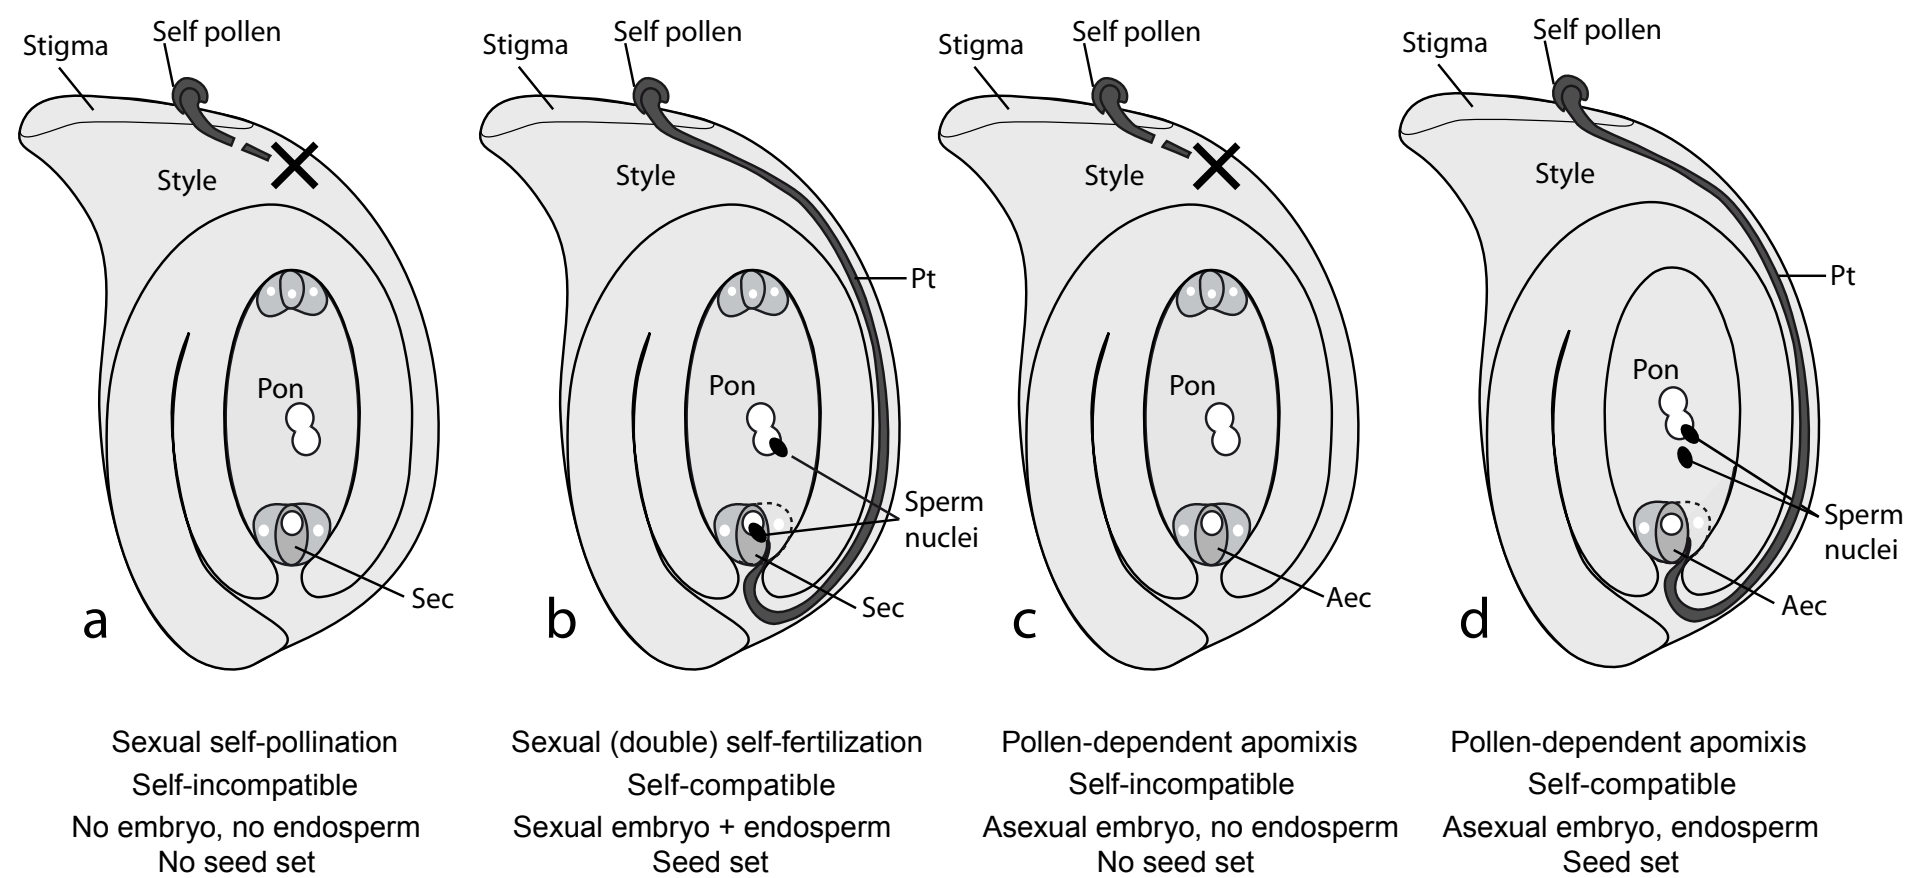

Supplement: hdy20131x1.pdf [file hdy20131x1.pdf]

(A)

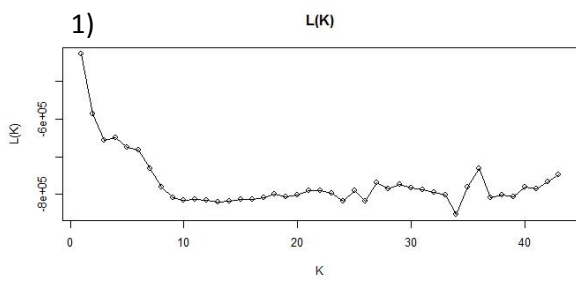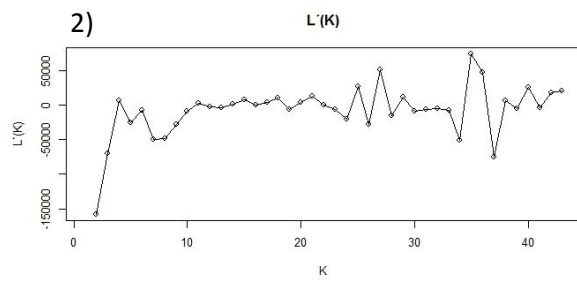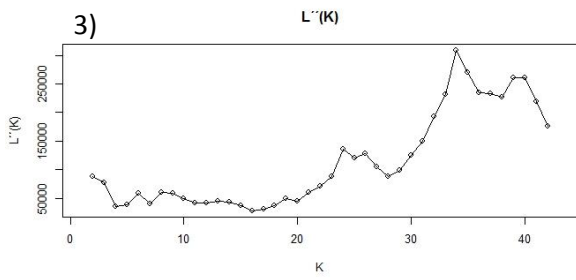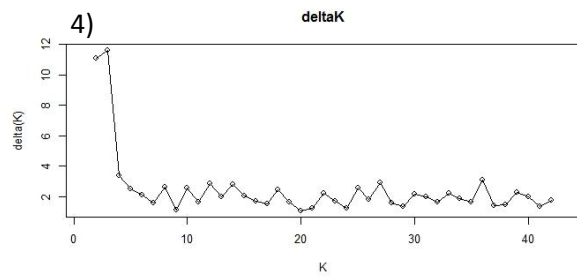

(B)

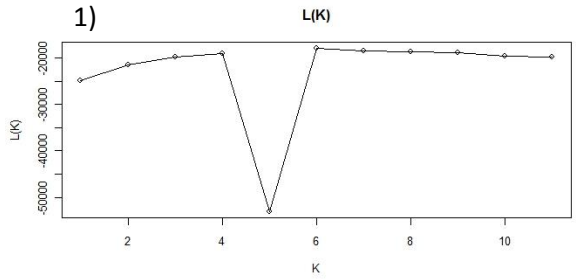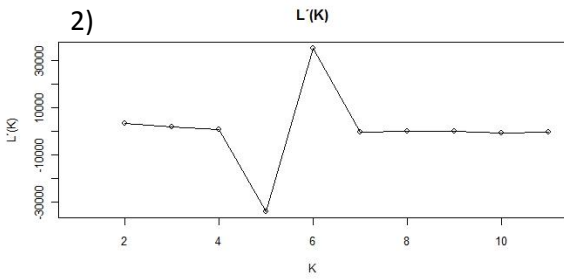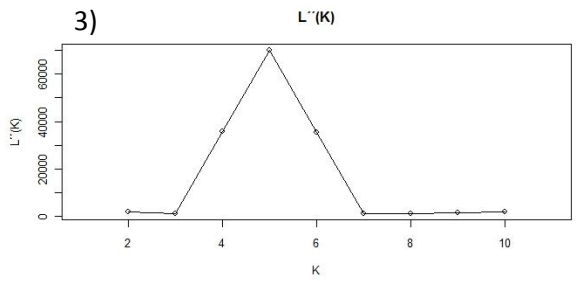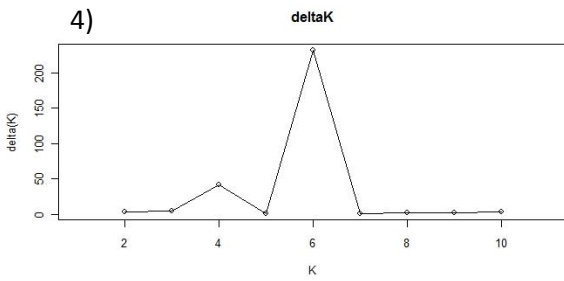

(C)

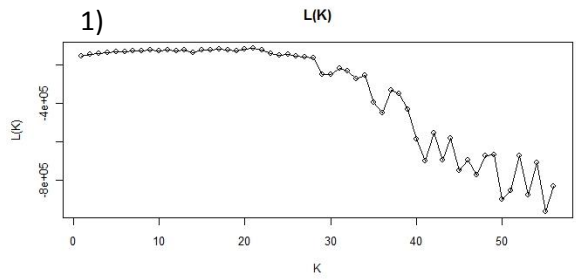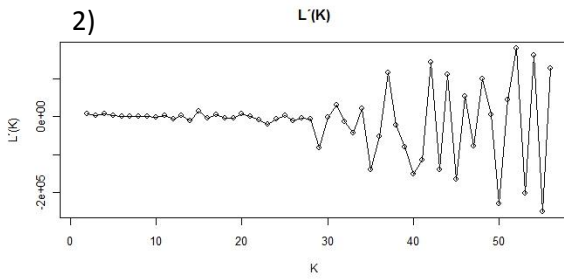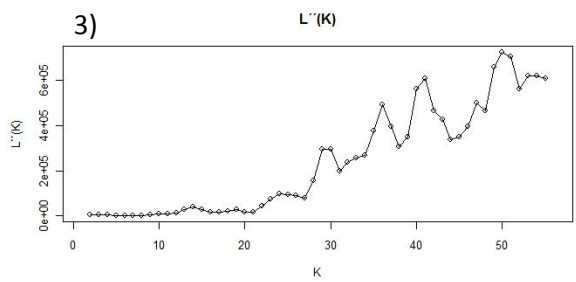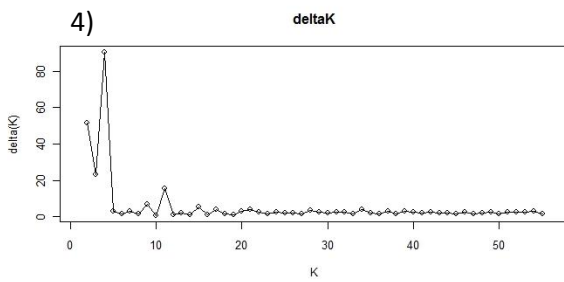

Supplement: hdy20131x4.pdf [file hdy20131x4.pdf]

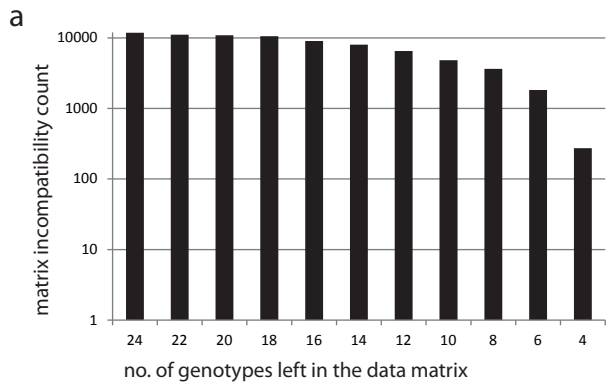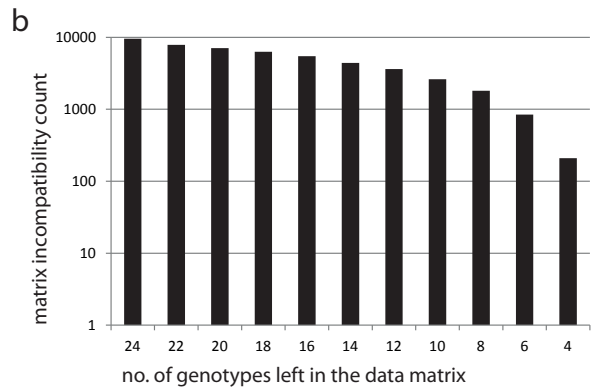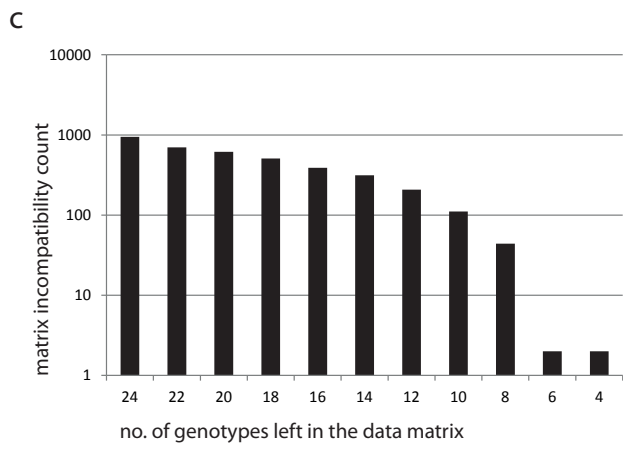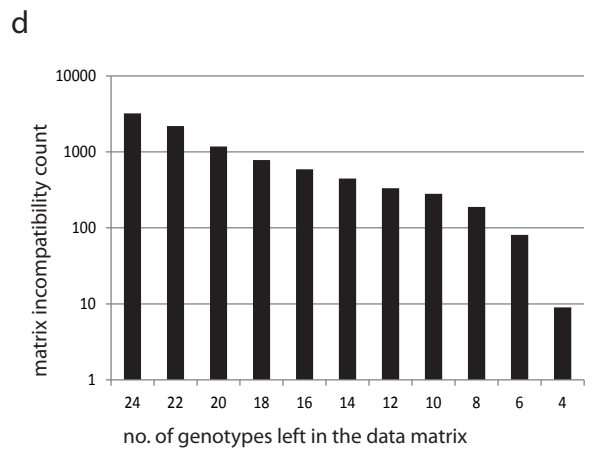

Supplement: hdy20131x7.pdf [file hdy20131x7.pdf]
